# Supplementary material for: Dithiocarbamate modification of activated carbon for the efficient removal of Pb(ii), Cd(ii), and Cu(ii) from wastewater
Source: Royal Society of Chemistry journal article supplement (doi:10.1039/d1nj05293d), 2022-01-01
Supplement: d1nj05293d1.pdf [file d1nj05293d1.pdf]

## Supporting Information

### **Dithiocarbamate Modification of Activated Carbon for the Efficient Removal of Pb(II), Cd(II), and Cu(II) from Water**

Huaiyuan Niu<sup>a</sup>, Xueting Li<sup>b</sup>, Jishan Li<sup>a\*</sup>

<sup>a</sup>State Key Laboratory of Chemo/Biosensing and Chemometrics, College of Chemistry and Chemical Engineering, Hunan University, Changsha, 410082, china.

<sup>b</sup>College of Environmental Science Engineering, Key Laboratory of Environmental Biology Pollution Control, Ministry of Education, Hunan University, Changsha 410082, China

**\*Corresponding Author:** Jishan Li; E-mail: jishanli@hnu.edu.cn; Fax: +86 731-88821848

**Table S1** The equations of applied kinetics models and isotherm models.

|               | equation                            | equation                                  | parameters                                                                                                                                                                      |
|---------------|-------------------------------------|-------------------------------------------|---------------------------------------------------------------------------------------------------------------------------------------------------------------------------------|
|               | Pseudo-first-model(PFO)             | $q_t = q_e(1 - e^{-k_1 t})$               | qt and qe are the adsorption capacities at the time t and at equilibrium (mg/g); k1 is the rate constant of the PFO kinetic model (min <sup>-1</sup> ).                         |
| kinetic model | Pseudo-second-model(PSO)            | $q_t = \frac{k_2 q_e^2 t}{1 + k_2 q_e t}$ | k2 is the rate constant of PSO kinetic model (g mg <sup>-1</sup> min <sup>-1</sup> ).                                                                                           |
|               | Intra-particle diffusion model(IPD) | $q_t = k_{id} t^{1/2} + C_i$              | kid is the diffusion rate constant of intra-particle model (mg/(g·min)); Ci is the thickness of the boundary layers (mg/g).                                                     |
|               | Langmuir                            | $q_e = \frac{q_m K_L C_e}{1 + K_L C_e}$   | KL is the Langmuir constant (L/g); qm is the theoretical maximum adsorption capacity (mg/g);.                                                                                   |
| isotherm      | Freundlich                          | $q_e = K_F C_e^{1/n}$                     | KF is the Freundlich constant indicative of the relative adsorption capacity of the adsorbent (mg/g); n represents Freundlich constant indicative of the heterogeneity factor.  |
|               | Temkin                              | $q_e = \frac{RT}{b_T} \ln a_T C_e$        | aT is equilibrium binding constant related to the maximum adsorption binding energy (L/mg); bT is the Temkin constant corresponding to heat of sorption (kJ/mol), respectively. |

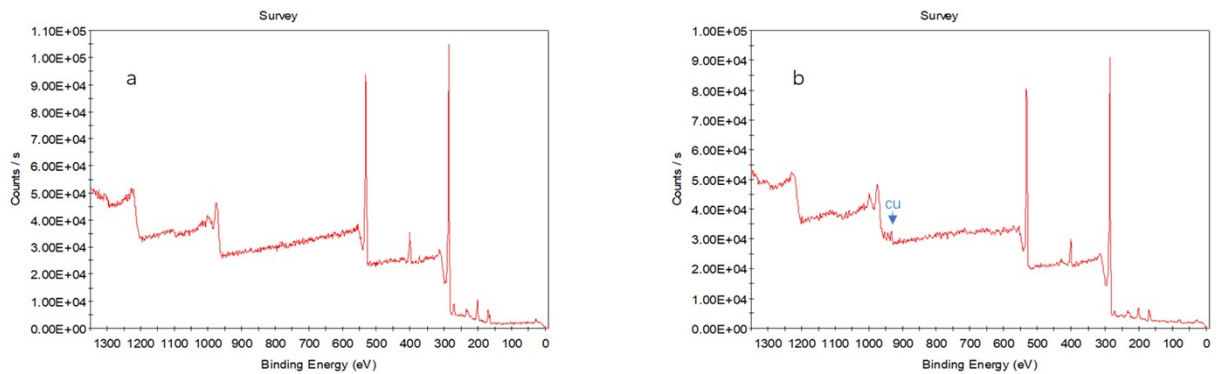

**Fig. S1.** XPS survey spectrum of DTC-AC(a) and Cu-loaded DTC-AC(b).
